# Supplementary material for: A Simple Index of Lake Ecosystem Health Based on Species-Area Models of Macrobenthos
Source: MDPI journal article supplement (doi:10.3390/ijerph19159678), 2022-08-05
Supplement: s1 [file s1]

## **Supplementary Material:**

**Table S1:** Basic information of the lakes.

**Table S2:** Number of zoobenthos taxa in the five lake districts.

**Table S3:** Abbreviation and full name of assessment indices

**Table S4:** Abbreviation and description of potential environmental predictors used in modeling.

**Figure S1.** Spatial pattern of macrobenthos of shallow lakes along the mid-lower Yangtze River.

**Figure S2.** Sampling point vs. residual local taxa richness for macrozoobenthos.

**Figure S3.** Quantile regressions of O/E<sub>50</sub> index on total nitrogen (TN, mg/L), total phosphorus (TP, mg/L), chlorophyll *a* of phytoplankton (Chl *a*, µg/L), Secchi depth (Z<sub>SD</sub>, m), annual submersed macrophytes biomass (B<sub>Mac</sub>, g/m<sup>2</sup>) and ratio of Secchi depth to water depth (Z<sub>SD</sub>/Z<sub>M</sub>, m) (sample sizes differ because of deficient sampling).

**Figure S4.** Quantile regressions of B-IBI index on total nitrogen (TN, mg/L), total phosphorus (TP, mg/L), chlorophyll *a* of phytoplankton (Chl *a*, µg/L), Secchi depth (Z<sub>SD</sub>, m), annual submersed macrophytes biomass (B<sub>Mac</sub>, g/m<sup>2</sup>) and ratio of Secchi depth to water depth (Z<sub>SD</sub>/Z<sub>M</sub>, m) (sample sizes differ because of deficient sampling).

**Figure S5.** Quantile regressions of ASPT index on total nitrogen (TN, mg/L), total phosphorus (TP, mg/L), chlorophyll *a* of phytoplankton (Chl *a*, µg/L), Secchi depth (Z<sub>SD</sub>, m), annual submersed macrophytes biomass (B<sub>Mac</sub>, g/m<sup>2</sup>) and ratio of Secchi depth to water depth (Z<sub>SD</sub>/Z<sub>M</sub>, m) (sample sizes differ because of deficient sampling).

# Supplementary Material

**Table S1.** Basic information of the lakes

| ID | Lake names                            | Latitude         | Longitude      | Water area<br>(km <sup>2</sup> ) | Shoreline<br>_development | Z <sub>Mean</sub> (m) | Z <sub>M</sub> (m) | Z <sub>SD</sub> (m) |
|----|---------------------------------------|------------------|----------------|----------------------------------|---------------------------|-----------------------|--------------------|---------------------|
| 1  | Central Taihu Lake                    | 120°04'-120°18'E | 31°01'-31°19'N | 885.00                           | 3.2                       | 2.2                   | 2.30               | 0.35                |
| 2  | Chaohu Lake1                          | 117°16'-117°51'E | 31°25'-31°43'N | 769.55                           | 1.92                      | 2.6                   | 1.56               | 0.40                |
| 3  | Chaohu Lake2                          | 117°16'-117°51'E | 31°25'-31°43'N | 769.55                           | 1.92                      | 2.6                   |                    |                     |
| 4  | Southwest Taihu Lake                  | 119°54'-120°14'E | 30°56'-31°18'N | 555.00                           | 3.2                       | 2.2                   | 1.92               | 0.32                |
| 5  | North Taihu Lake                      | 119°58'-120°24'E | 31°19'-31°32'N | 453.00                           | 3.2                       | 2.2                   | 2.03               | 0.34                |
| 6  | East Area of Taihu Lake <sup>*1</sup> | 120°18'-120°29'E | 31°02'-31°18'N | 263.00                           | 3.2                       | 2.2                   | 1.69               | 0.46                |
| 7  | Longganhu Lake1 <sup>*1</sup>         | 115°59'-116°18'E | 29°51'-30°05'N | 252.00                           | 4.88                      | 5.5                   |                    |                     |
| 8  | Longganhu Lake2                       | 115°59'-116°18'E | 29°51'-30°05'  | 252.00                           | 4.88                      | 5.5                   | 1.99               | 1.19                |
| 9  | Longganhu Lake3                       | 115°59'-116°18'E | 29°51'-30°05'N | 253.00                           | 4.88                      | 5.5                   | 1.65               | 0.37                |
| 10 | East Taihu Lake <sup>*1</sup>         | 120°20'-120°38'E | 30°56'-31°12'N | 182.00                           | 3.2                       | 2.2                   | 1.50               | 0.30                |
| 11 | Pohu Lake                             | 116°19'-116°33'E | 30°04'-30°15'N | 180.40                           | 4.05                      | 5.7                   |                    |                     |
| 12 | Liangzihu Lake <sup>*1</sup>          | 114°25'-114°36'E | 30°07'-30°17'N | 174.52                           | 8.8                       | 7.4                   | 2.23               | 1.42                |
| 13 | Huanghu Lake1 <sup>*1</sup>           | 116°23'-116°32'E | 29°56'-30°05'N | 118.60                           | 4.58                      | 6                     |                    |                     |
| 14 | Huanghu Lake2                         | 116°23'-116°32'E | 29°56'-30°05'N | 118.60                           | 4.58                      | 6                     | 1.74               | 0.27                |
| 15 | Huanghu Lake3                         | 116°23'-116°32'E | 29°56'-30°05'N | 118.60                           | 4.58                      | 6                     | 1.80               | 0.16                |
| 16 | Futouhu Lake                          | 114°09'-114°20'E | 29°55'-30°07'N | 52.60                            | 4.87                      | 5.2                   | 0.50               | 0.60                |
| 17 | Niushanhu Lake1 <sup>*1</sup>         | 114°27'-114°38'E | 30°16'-30°22'N | 40.81                            | 8.8                       | 7.4                   | 2.90               | 2.63                |
| 18 | Niushanhu Lake2                       | 114°27'-114°38'E | 30°16'-30°22'N | 40.81                            | 8.8                       | 7.4                   | 2.46               | 1.91                |
| 19 | Donghu Lake                           | 114°21'-114°28'E | 30°31'-30°36'N | 33.70                            | 3.405                     | 4                     | 2.92               | 0.74                |
| 20 | Dongtangxunhu Lake1 <sup>*1</sup>     | 114°19'-114°29'E | 30°23'-30°29'N | 31.75                            | 4.92                      | 4.1                   | 2.28               | 1.04                |
| 21 | Dongtangxunhu Lake2                   | 114°19'-114°29'E | 30°23'-30°29'N | 31.75                            | 4.92                      | 4.1                   | 1.60               | 0.67                |
| 22 | Chenhu Lake                           | 113°50'-113°52'E | 30°17'-30°20'N | 11.10                            | 2.89                      | 1                     |                    |                     |
| 23 | Cihu Lake                             | 115°01'-115°05'E | 30°11'-30°13'N | 10.50                            | 2.47                      | 8.5                   | 2.32               | 0.51                |

|    |                               |                  |                |        |      |      |      |      |
|----|-------------------------------|------------------|----------------|--------|------|------|------|------|
| 24 | Zhangjiadahu Lake             | 113°48'-113°50'E | 30°17'-30°17'N | 8.11   | 2.89 | 1    | 0.93 | 0.35 |
| 25 | Honghu Lake <sup>*2</sup>     | 113°11'-113°28'E | 29°38'-29°59'N | 355.00 | 5.34 | 2.2  |      |      |
| 26 | Longganhu Lake <sup>*2</sup>  | 115°59'-116°18'E | 29°51'-30°05'N | 252.00 | 4.88 | 5.5  | 0.71 | 0.33 |
| 27 | Junshanhu Lake <sup>*2</sup>  | 116°15'-116°28'E | 28°24'-28°38'N | 192.50 | 5.62 | 7.5  | 3.37 | 2.14 |
| 28 | Dianshanhu Lake               | 120°53'-120°01'E | 31°04'-31°12'N | 63.70  | 1.86 | 1.8  | 1.93 | 0.54 |
| 29 | Luhu Lake <sup>*3</sup>       | 114°08'-114°17'E | 30°09'-30°20'N | 29.80  | 4.04 | 3.1  | 2.61 | 1.16 |
| 30 | Tian'e zhou Oxbow             | 112°33'-112°37'E | 29°47'-29°51'N | 20.00  | 2.92 | 2.6  | 7.94 | 0.64 |
| 31 | Laojianghe Oxbow              | 112°59'-113°04'E | 29°31'-29°35'N | 18.40  | 2.95 | 1.8  | 5.30 | 0.68 |
| 32 | Huamahu Lake <sup>*4</sup>    | 114°58'-115°04'E | 30°15'-30°22'N | 10.30  | 4    | 3.55 | 2.18 | 0.70 |
| 33 | Nanhu Lake                    | 114°12'-114°18'E | 30°27'-30°31'N | 7.67   | 3.29 | 4.3  | 2.36 | 0.33 |
| 34 | Taojiadahu Lake <sup>*4</sup> | 114°36'-114°38'E | 30°37'-30°39'N | 3.00   | 4.75 | 4.9  | 1.69 | 2.20 |
| 35 | Sanliqihu Lake                | 114°56'-114°57'E | 30°05'-30°06'N | 2.70   | 2.07 | 2.3  | 1.95 | 0.51 |
| 36 | Qinglinghu Lake               | 114°12'-114°16'E | 30°22'-30°27'N | 2.00   | 2.45 | 2.9  | 1.28 | 0.46 |
| 37 | Moshuihu Lake                 | 114°11'-114°15'E | 30°31'-30°34'N | 1.50   | 2.61 | 2.1  | 2.19 | 0.33 |
| 38 | Qihu Lake <sup>*4</sup>       | 114°37'-114°40'E | 30°36'-30°37'N | 1.30   | 2.41 | 2.5  |      |      |
| 39 | Hongxinghu Lake               | 114°57'-114°57'E | 30°05'-30°05'N | 0.50   | 1.08 | 2.9  | 2.73 | 0.52 |
| 40 | Main Area of Baoanhu Lake1    | 114°39'-114°49'E | 30°12'-30°18'N | 18.00  | 3.54 | 3.4  |      |      |
| 41 | Xiaosihai Lake1               | 114°40'-114°42'E | 30°17'-30°18'N | 7.00   | 3.54 | 3.4  |      |      |
| 42 | Shahu Lake                    | 114°19'-114°21'E | 30°33'-30°34'N | 3.08   | 1.49 | 3.7  | 0.50 | 0.34 |
| 43 | Yanxihu Lake <sup>*1</sup>    | 114°27'-114°30'E | 30°32'-30°35'N | 14.23  | 4.34 | 3.9  | 3.10 | 0.54 |
| 44 | Yandonghu Lake <sup>*4</sup>  | 114°32'-114°35'E | 30°31'-30°33'N | 9.11   | 2.6  | 4.4  | 1.60 | 1.60 |
| 45 | Shuiguohu Lake                | 114°21'-114°21'E | 30°33'-30°33'N | 0.12   | 4.55 | 5.8  | 2.50 | 0.55 |
| 46 | Yangchunhu Lake               | 114°25'-114°25'E | 30°37'-30°37'N | 2.00   | 2.21 | 2.1  | 0.80 | 0.50 |
| 47 | Beihu Lake1                   | 114°30'-114°31'E | 30°36'-30°37'N | 3.00   | 1.37 | 1.6  | 2.00 | 0.61 |
| 48 | Zhuzihu Lake                  | 114°31'-114°32'E | 30°34'-30°34'N | 7.00   | 1.52 | 2.4  |      |      |
| 49 | Zhangduhu Lake                | 114°40'-114°48'E | 30°37'-30°42'N | 35.20  | 1.29 | 1.4  | 1.67 | 0.85 |
| 50 | Gehu Lake                     | 119°44'-119°53'E | 31°29'-31°42'N | 146.50 | 1.52 | 2.9  | 0.94 | 0.47 |
| 51 | Yangchenghu Lake              | 120°39'-120°51'E | 31°21'-31°30'N | 113.00 | 3.8  | 1.7  | 1.45 | 0.77 |

|    |                            |                  |                |       |       |      |      |      |
|----|----------------------------|------------------|----------------|-------|-------|------|------|------|
| 52 | Wuchanghu Lake*2           | 116°36'-116°53'E | 30°14'-30°20'N | 86.60 | 3.275 | 3.95 |      |      |
| 53 | Longyanghu Lake1           | 114°09'-114°12'E | 30°32'-30°34'N | 1.80  | 2.33  | 2.2  |      |      |
| 54 | Longyanghu Lake2           | 114°09'-114°12'E | 30°32'-30°34'N | 1.80  | 2.33  | 2.2  |      |      |
| 55 | Niushanhu Lake3            | 114°27'-114°38'E | 30°16'-30°22'N | 40.81 | 8.8   | 7.4  | 3.57 | 2.79 |
| 56 | Niushanhu Lake4            | 114°27'-114°38'E | 30°16'-30°22'N | 40.81 | 8.8   | 7.4  | 3.57 | 2.79 |
| 57 | West Liangzihu Lake1       | 114°25'-114°29'E | 30°09'-30°14'N | 66.70 | 8.8   | 7.4  | 3.79 | 2.48 |
| 58 | West Liangzihu Lake2       | 114°25'-114°29'E | 30°09'-30°14'N | 66.70 | 8.8   | 7.4  | 3.79 | 2.48 |
| 59 | Main Area of Baoanhu Lake2 | 114°39'-114°49'E | 30°12'-30°18'N | 23.90 |       | 3.4  | 2.08 | 1.79 |
| 60 | Biandantang Lake1          | 114°43'-114°44'E | 30°17'-30°18'N | 3.30  |       | 3.4  | 2.17 | 1.36 |
| 61 | Xiaosihai Lake2            | 114°40'-114°42'E | 30°17'-30°18'N | 1.30  |       | 3.4  | 1.80 | 1.27 |
| 62 | Baoankou Lake1*3           | 114°43'-114°44'E | 30°12'-30°13'N | 2.80  | 3.54  | 3.4  | 2.18 | 1.54 |
| 63 | Qiaodunhu Lake1            | 114°39'-114°41'E | 30°14'-30°15'N | 8.00  | 3.54  | 3.4  |      |      |
| 64 | Qiaodunhu Lake2            | 114°39'-114°41'E | 30°14'-30°15'N | 8.00  |       | 3.4  | 1.90 | 0.42 |
| 65 | Baoankou Lake1             | 114°43'-114°44'E | 30°12'-30°13'N | 2.80  |       | 3.4  | 1.70 | 0.69 |
| 66 | Biandantang Lake2          | 114°43'-114°44'E | 30°17'-30°18'N | 3.30  | 3.54  | 3.4  | 1.80 | 0.46 |
| 67 | Xiaosihai Lake3*3          | 114°40'-114°42'E | 30°17'-30°18'N | 1.30  |       | 3.4  | 0.60 | 0.50 |
| 68 | Niushanhu Lake5            | 114°27'-114°38'E | 30°16'-30°22'N | 40.81 |       | 3.4  | 2.80 | 2.20 |
| 69 | West Liangzihu Lake3*3     | 114°25'-114°29'E | 30°09'-30°14'N | 66.70 |       | 3.4  | 3.20 | 2.80 |
| 70 | Houguanhu Lake1            | 114°06'-114°07'E | 30°29'-30°30'N | 12.70 | 4.27  | 2    |      |      |
| 71 | Zhushanhu Lake             | 114°05'-114°08'E | 30°26'-30°27'N | 3.69  | 4.79  | 2.8  |      |      |
| 72 | Chuanjiangchi Lake         | 114°07'-114°08'E | 30°25'-30°25'N | 0.29  | 2.22  | 2.1  |      |      |
| 73 | Guanlianhu Lake1           | 114°01'-114°04'E | 30°23'-30°24'N | 5.39  | 3.13  | 2.8  |      |      |
| 74 | Zhongshanhu Lake           | 114°05'-114°05'E | 30°24'-30°24'N | 0.20  | 1.86  | 2.3  |      |      |
| 75 | Nantaizihu Lake            | 114°11'-114°12'E | 30°29'-30°30'N | 3.57  | 1.71  | 2.6  |      |      |
| 76 | Wanjiahu Lake              | 114°11'-114°12'E | 30°28'-30°28'N | 1.05  | 1.64  | 2.4  |      |      |
| 77 | Zhulinhu Lake              | 114°09'-114°10'E | 30°26'-30°26'N | 0.23  | 1.64  | 1.8  |      |      |
| 78 | Wulanghu Lake              | 114°05'-114°05'E | 30°24'-30°24'N | 0.31  | 1.99  | 2.1  |      |      |
| 79 | Longhu Lake                | 114°08'-114°08'E | 30°22'-30°22'N | 0.09  | 1.64  | 1.8  |      |      |

|     |                     |                  |                |        |      |     |      |      |
|-----|---------------------|------------------|----------------|--------|------|-----|------|------|
| 80  | Tanzihu Lake        | 114°00'-114°00'E | 30°20'-30°20'N | 0.17   |      | 4   |      |      |
| 81  | Wanhu Lake          | 114°01'-114°01'E | 30°21'-30°21'N | 0.24   | 1.12 | 1.4 |      |      |
| 82  | Shentanhu Lake      | 114°00'-114°00'E | 30°20'-30°20'N | 0.11   |      | 1.7 |      |      |
| 83  | Xiashanhu Lake      | 114°01'-114°01'E | 30°21'-30°21'N | 0.23   |      | 1.7 |      |      |
| 84  | Zhumuhu Lake        | 114°05'-114°05'E | 30°22'-30°22'N | 0.12   | 1.49 | 2.1 |      |      |
| 85  | Niuweihi Lake       | 114°05'-114°05'E | 30°24'-30°24'N | 0.05   |      | 1.5 |      |      |
| 86  | Shangwuqiu Lake     | 114°05'-114°05'E | 30°24'-30°24'N | 0.12   |      | 1.4 |      |      |
| 87  | Zhuangyuanhu Lake   | 114°05'-114°05'E | 30°24'-30°24'N | 0.23   | 2.22 | 2.1 |      |      |
| 88  | Houguanhu Lake2     | 114°06'-114°07'E | 30°29'-30°30'N | 12.70  | 4.27 | 2   | 2.52 | 1.27 |
| 89  | Sanjiaohu Lake      | 114°10'-114°11'E | 30°31'-30°32'N | 0.50   | 1.72 | 2.1 | 1.60 | 0.77 |
| 90  | Liangzihu Lake2     | 114°25'-114°36'E | 30°07'-30°17'N | 174.52 |      | 3.4 |      |      |
| 91  | Houguanhu Lake3     | 114°00'-114°07'E | 30°28'-30°33'N | 34.00  | 4.32 | 2.2 |      |      |
| 92  | Wuhu Lake           | 114°28'-114°32'E | 30°46'-30°50'N | 30.60  | 2.81 | 2.5 |      |      |
| 93  | Wangjiashe Lake*4   | 113°52'-113°53'E | 30°20'-30°21'N | 8.75   | 1.34 | 0.5 |      |      |
| 94  | Guanlianhu Lake2    | 114°01'-114°04'E | 30°23'-30°24'N | 5.39   | 3.13 | 2.8 |      |      |
| 95  | Chaibohu Lake       | 114°34'-114°35'E | 30°40'-30°42'N | 3.30   | 1.9  | 2.8 |      |      |
| 96  | Beihu Lake2         | 114°30'-114°32'E | 30°35'-30°37'N | 1.94   | 1.37 | 1.6 |      |      |
| 97  | Longyanghu Lake     | 114°09'-114°12'E | 30°32'-30°34'N | 1.68   | 2.33 | 2.2 |      |      |
| 98  | Pingtanghu Lake     | 114°08'-114°08'E | 30°18'-30°19'N | 1.65   | 3.18 | 3.2 |      |      |
| 99  | Jinduihu Lake       | 113°58'-113°58'E | 30°23'-30°24'N | 0.68   | 1.66 | 2.5 |      |      |
| 100 | Qingtianhu Lake     | 114°32'-114°34'E | 30°33'-30°34'N | 0.60   | 1.91 | 3.6 |      |      |
| 101 | Longjiadahu Lake    | 113°53'-113°54'E | 30°26'-30°27'N | 0.57   | 2.09 | 2.1 |      |      |
| 102 | Wanglanghu Lake     | 114°08'-114°08'E | 30°18'-30°18'N | 0.43   | 1.44 | 1.5 |      |      |
| 103 | Chongrenhu Lake     | 113°56'-113°56'E | 30°25'-30°26'N | 0.38   | 1.59 | 2.4 |      |      |
| 104 | Biyanhu Lake        | 113°55'-113°55'E | 30°26'-30°26'N | 0.31   |      | 1.5 |      |      |
| 105 | Xiaoguanlianhu Lake | 114°03'-114°04'E | 30°22'-30°22'N | 0.29   | 1.42 | 2.1 |      |      |
| 106 | Yangjianghu Lake    | 114°07'-114°08'E | 30°19'-30°20'N | 0.29   |      | 1   |      |      |
| 107 | Qianhu Lake         | 114°09'-114°09'E | 30°16'-30°16'N | 0.19   |      | 1   |      |      |
| 108 | Daoshihu Lake       | 114°11'-114°11'E | 30°23'-30°23'N | 0.16   | 3.47 | 1.3 |      |      |

|     |                    |                  |                |      |      |     |
|-----|--------------------|------------------|----------------|------|------|-----|
| 109 | Yanjiahu Lake      | 114°35'-114°35'E | 30°38'-30°39'N | 0.15 | 4.75 | 4.9 |
| 110 | Xiaojinjishai Lake | 113°55'-113°55'E | 30°26'-30°26'N | 0.13 | 2.49 | 1.8 |
| 111 | Guojiahu Lake      | 114°11'-114°11'E | 30°22'-30°22'N | 0.12 | 1.3  | 2.6 |
| 112 | Zhangjiadahu Lake2 | 113°48'-113°50'E | 30°17'-30°17'N | 8.11 | 2.89 | 1   |
| 113 | Xiashehu Lake      | 114°09'-114°10'E | 30°08'-30°08'N | 1.17 | 2.05 | 2   |
| 114 | Songjiaqi Lake     | 114°10'-114°10'E | 30°10'-30°10'N | 0.28 | 1.65 | 2   |
| 115 | Lianhuahu Lake     | 114°16'-114°17'E | 30°33'-30°33'N | 0.28 |      | 1   |
| 116 | Kuzhuhai Lake      | 114°12'-114°13'E | 30°05'-30°06'N | 7.25 | 1.62 | 1.5 |

---

\*Reference site used in O/E-*RF*; number after \*represents reference group used in O/E-*RF*;  $Z_{Mean}$ , mean water depth; the lakes are ordered by the data sources; the numbers immediately after the lake names mean different year visited.

**Table S2.** Number of zoobenthos taxa in the five lake districts (1998-2019)

|                    | Taihu<br>Plain | Suwan<br>Plain | Ganwan<br>Plain | Jiangnan<br>Plain | Dongtinghu<br>Plain | Total | Percent (%) |
|--------------------|----------------|----------------|-----------------|-------------------|---------------------|-------|-------------|
| <b>Annelida</b>    |                |                |                 |                   |                     |       |             |
| <b>Oligochaeta</b> | 12             | 9              | 6               | 15                | 23                  | 25    | 13.3        |
| Naididae           | 12             | 9              | 6               | 15                | 23                  | 25    | 13.3        |
| <b>Hirudinea</b>   | 1              | 0              | 2               | 7                 | 0                   | 8     | 4.3         |
| Erpobdellidae      | 0              | 0              | 0               | 2                 | 0                   | 2     | 1.1         |
| Glossiphoniidae    | 1              | 0              | 2               | 5                 | 0                   | 6     | 3.2         |
| Hirudinidae        | 0              | 0              | 0               | 1                 | 0                   | 1     | 0.5         |
| <b>Polychaeta</b>  | 5              | 3              | 2               | 0                 | 0                   | 6     | 3.2         |
| Capitellidae       | 1              | 1              | 0               | 0                 | 0                   | 1     | 0.5         |
| Nephtyidae         | 1              | 1              | 1               | 0                 | 0                   | 2     | 1.1         |
| Nereididae         | 1              | 1              | 1               | 0                 | 0                   | 1     | 0.5         |
| Sabellidae         | 1              | 0              | 0               | 0                 | 0                   | 1     | 0.5         |
| Spionidae          | 1              | 0              | 0               | 0                 | 0                   | 1     | 0.5         |
| <b>Mollusca</b>    |                |                |                 |                   |                     |       |             |
| <b>Gastropoda</b>  | 7              | 7              | 9               | 21                | 3                   | 28    | 14.9        |
| Ampullariidae      | 0              | 0              | 1               | 1                 | 0                   | 1     | 0.5         |
| Bithyniidae        | 2              | 0              | 3               | 6                 | 2                   | 6     | 3.2         |
| Lymnaeidae         | 0              | 3              | 1               | 3                 | 0                   | 4     | 2.1         |
| Physidae           | 0              | 0              | 0               | 1                 | 0                   | 1     | 0.5         |
| Planorbidae        | 0              | 3              | 0               | 4                 | 0                   | 6     | 3.2         |
| Pleuroseridae      | 1              | 0              | 1               | 1                 | 0                   | 2     | 1.1         |
| Pomatiopsidae      | 0              | 0              | 0               | 1                 | 0                   | 1     | 0.5         |
| Stenothyridae      | 1              | 0              | 1               | 0                 | 0                   | 1     | 0.5         |
| Viviparidae        | 3              | 1              | 2               | 4                 | 1                   | 7     | 3.7         |
| <b>Bivalvia</b>    | 4              | 3              | 4               | 8                 | 1                   | 14    | 7.4         |
| Corbiculidae       | 2              | 1              | 1               | 1                 | 0                   | 2     | 1.1         |
| Mytilidae          | 1              | 1              | 1               | 1                 | 1                   | 1     | 0.5         |
| Solecurtidae       | 1              | 0              | 0               | 0                 | 0                   | 1     | 0.5         |
| Sphaeriidae        | 0              | 0              | 0               | 1                 | 0                   | 2     | 1.1         |
| Unionidae          | 0              | 1              | 2               | 5                 | 0                   | 8     | 4.3         |
| <b>Arthropoda</b>  |                |                |                 |                   |                     |       |             |
| <b>Crustacea</b>   | 3              | 3              | 3               | 4                 | 0                   | 8     | 4.3         |
| Anthuridae         | 1              | 0              | 1               | 0                 | 0                   | 1     | 0.5         |
| Aoridae            | 1              | 0              | 0               | 0                 | 0                   | 1     | 0.5         |
| Atyidae            | 0              | 1              | 1               | 0                 | 0                   | 1     | 0.5         |
| Gammaridae         | 1              | 0              | 1               | 1                 | 0                   | 1     | 0.5         |
| Palaemonidae       | 0              | 2              | 0               | 3                 | 0                   | 4     | 2.1         |
| <b>Insecta</b>     | 23             | 22             | 42              | 68                | 18                  | 99    | 52.7        |
| Caenidae           | 0              | 0              | 1               | 0                 | 0                   | 1     | 0.5         |
| Heptageniidae      | 0              | 0              | 1               | 1                 | 0                   | 2     | 1.1         |
| Chlorogomphidae    | 0              | 0              | 0               | 1                 | 0                   | 1     | 0.5         |
| Gomphidae          | 0              | 0              | 0               | 2                 | 0                   | 2     | 1.1         |
| Libellulidae       | 0              | 0              | 0               | 1                 | 0                   | 1     | 0.5         |
| Pyalidae           | 0              | 0              | 0               | 1                 | 0                   | 1     | 0.5         |
| Aphelocheiridae    | 0              | 0              | 0               | 1                 | 0                   | 1     | 0.5         |
| Corixidae          | 0              | 0              | 0               | 1                 | 0                   | 1     | 0.5         |

|                   |    |    |    |     |    |     |      |
|-------------------|----|----|----|-----|----|-----|------|
| Chrysomelidae     | 0  | 0  | 1  | 0   | 0  | 1   | 0.5  |
| Dytiscidae        | 0  | 0  | 1  | 0   | 0  | 1   | 0.5  |
| Elmidae           | 0  | 0  | 2  | 0   | 0  | 2   | 1.1  |
| Hydropsychidae    | 0  | 0  | 1  | 0   | 0  | 2   | 1.1  |
| Polycentropodidae | 0  | 0  | 1  | 0   | 0  | 1   | 0.5  |
| Psychomyiidae     | 0  | 1  | 0  | 0   | 0  | 1   | 0.5  |
| Plecoptera        | 0  | 0  | 0  | 1   | 0  | 1   | 0.5  |
| Ceratopogonidae   | 0  | 0  | 0  | 2   | 1  | 2   | 1.1  |
| Chaoboridae       | 0  | 0  | 0  | 1   | 0  | 1   | 0.5  |
| Chironomidae      | 23 | 21 | 33 | 54  | 17 | 75  | 39.9 |
| Psychodidae       | 0  | 0  | 0  | 1   | 0  | 1   | 0.5  |
| Simuliidae        | 0  | 0  | 1  | 0   | 0  | 1   | 0.5  |
| Total             | 55 | 47 | 68 | 112 | 45 | 188 | 100  |

**Table S3.** Abbreviation and full name of assessment indices

| Abbreviation            | Full name                                                                                                            |
|-------------------------|----------------------------------------------------------------------------------------------------------------------|
| $S_O$                   | observed species richness                                                                                            |
| $S_E$                   | expected species richness                                                                                            |
| A                       | Area                                                                                                                 |
| $O/E_{SA}$              | observed to expected index based on species-area model                                                               |
| $O/E_{RF}$<br>(RIVPACS) | observed to expected index based on random forest model<br>(River Invertebrate Prediction and Classification System) |
| $O/E_0$                 | $O/E_{RF}$ based on taxa with probabilities of capture greater than 0                                                |
| $O/E_{50}$              | $O/E_{RF}$ based on taxa with probabilities of capture greater than 0.5                                              |
| $O/E_0$ -null           | null model of $O/E_0$                                                                                                |
| $O/E_{50}$ -null        | null model of $O/E_{50}$                                                                                             |
| B-IBI                   | Benthic Index of Biotic Integrity                                                                                    |
| ASPT                    | Average Score Per Taxon                                                                                              |

**Table S4.** Abbreviation and description of potential environmental predictors used in modeling

| Abbreviation | Description                                                         |
|--------------|---------------------------------------------------------------------|
| LON          | Longitude                                                           |
| LAT          | Latitude                                                            |
| Pour_long    | Pour_longitude                                                      |
| Pour_lat     | Pour_latitude                                                       |
| AREA*        | Lake area (km <sup>2</sup> )                                        |
| Wshd_area    | Watershed area (km <sup>2</sup> )                                   |
| Shore_len    | Length of shoreline (km)                                            |
| Depth_avg    | Average lake depth (m)                                              |
| Slope_100    | Average slope within a 100-meter buffer around the lake polygon (°) |
| Dis_avg      | Average long-term discharge flowing through the lake (m/s)          |
| Res_time*    | Average residence time of the lake water (day/year)                 |
| Mois         | Average moisture of lake (mm)                                       |
| SubBas_id    | Subbasin identity of lake                                           |
| ELEV_avg     | Average elevation within lake (m)                                   |
| bio_1        | Annual mean temperature (°C)                                        |
| bio_2*       | Mean diurnal range (°C)                                             |
| bio_3        | Isothermality                                                       |



|           |                                                                               |
|-----------|-------------------------------------------------------------------------------|
| bio_4     | Temperature seasonality (°C)                                                  |
| bio_5     | Max temperature of warmest month (°C)                                         |
| bio_6     | Mean of min temperature of warmest month (°C)                                 |
| bio_7     | Temperature annual range (°C)                                                 |
| bio_8     | Mean temperature of coldest quarter (°C)                                      |
| bio_9     | Mean temperature of driest quarter (°C)                                       |
| bio_10    | Mean temperature of warmest quarter (°C)                                      |
| bio_11*   | Mean temperature of coldest quarter (°C)                                      |
| bio_12    | Annual precipitation (mm)                                                     |
| bio_13    | Precipitation of wettest month (mm)                                           |
| bio_14    | Precipitation of driest month (mm)                                            |
| bio_15    | Precipitation seasonality (mm)                                                |
| bio_16    | Precipitation of wettest quarter (mm)                                         |
| bio_17    | Precipitation of driest quarter (mm)                                          |
| bio_18    | Precipitation of warmest quarter (mm)                                         |
| bio_19    | The precipitation of the coldest quarter (mm)                                 |
| Prec_mean | Mean precipitation of spring and autumn (°C)                                  |
| Tmax_mean | Mean of maximum temperature in spring and autumn (°C)                         |
| Tmin_mean | Mean of minimum temperature in spring and autumn (°C)                         |
| Prec_sd*  | The standard deviation of precipitation in spring and autumn (°C)             |
| Tmax_sd   | The standard deviation of maximum temperature in spring and autumn (°C)       |
| Tmin_sd   | The standard deviation of minimum temperature in spring and autumn (°C)       |
| Prec_cv   | The coefficient of variation of precipitation in spring and autumn (°C)       |
| Tmax_cv   | The coefficient of variation of maximum temperature in spring and autumn (°C) |
| Tmin_cv   | The coefficient of variation of minimum temperature in spring and autumn (°C) |

\*Environmental variable selected from RF model in O/E-RF

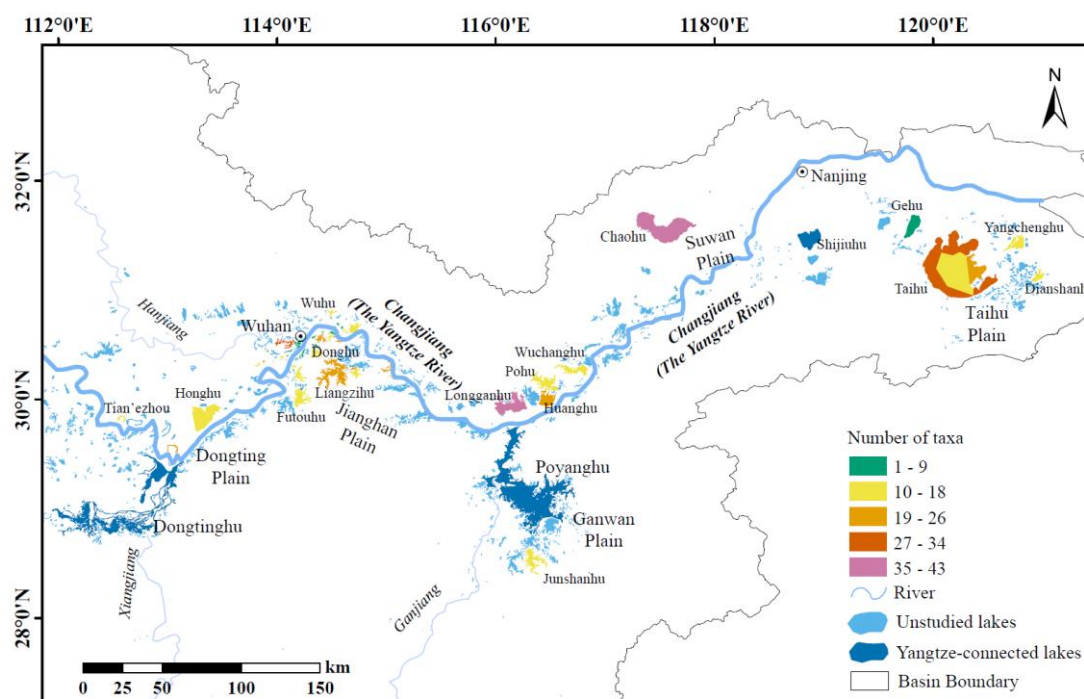

**Figure S1.** Spatial pattern of macrobenthos of shallow lakes along the mid-lower Yangtze River

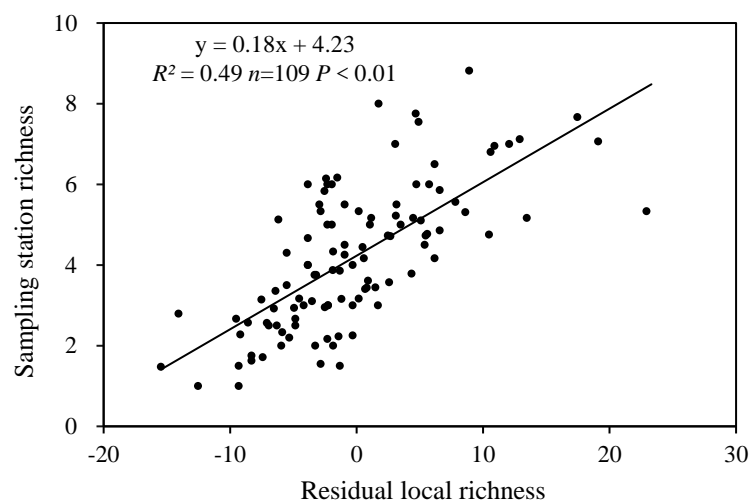

**Figure S2.** Sampling station vs. residual local taxa richness for macrozoobenthos

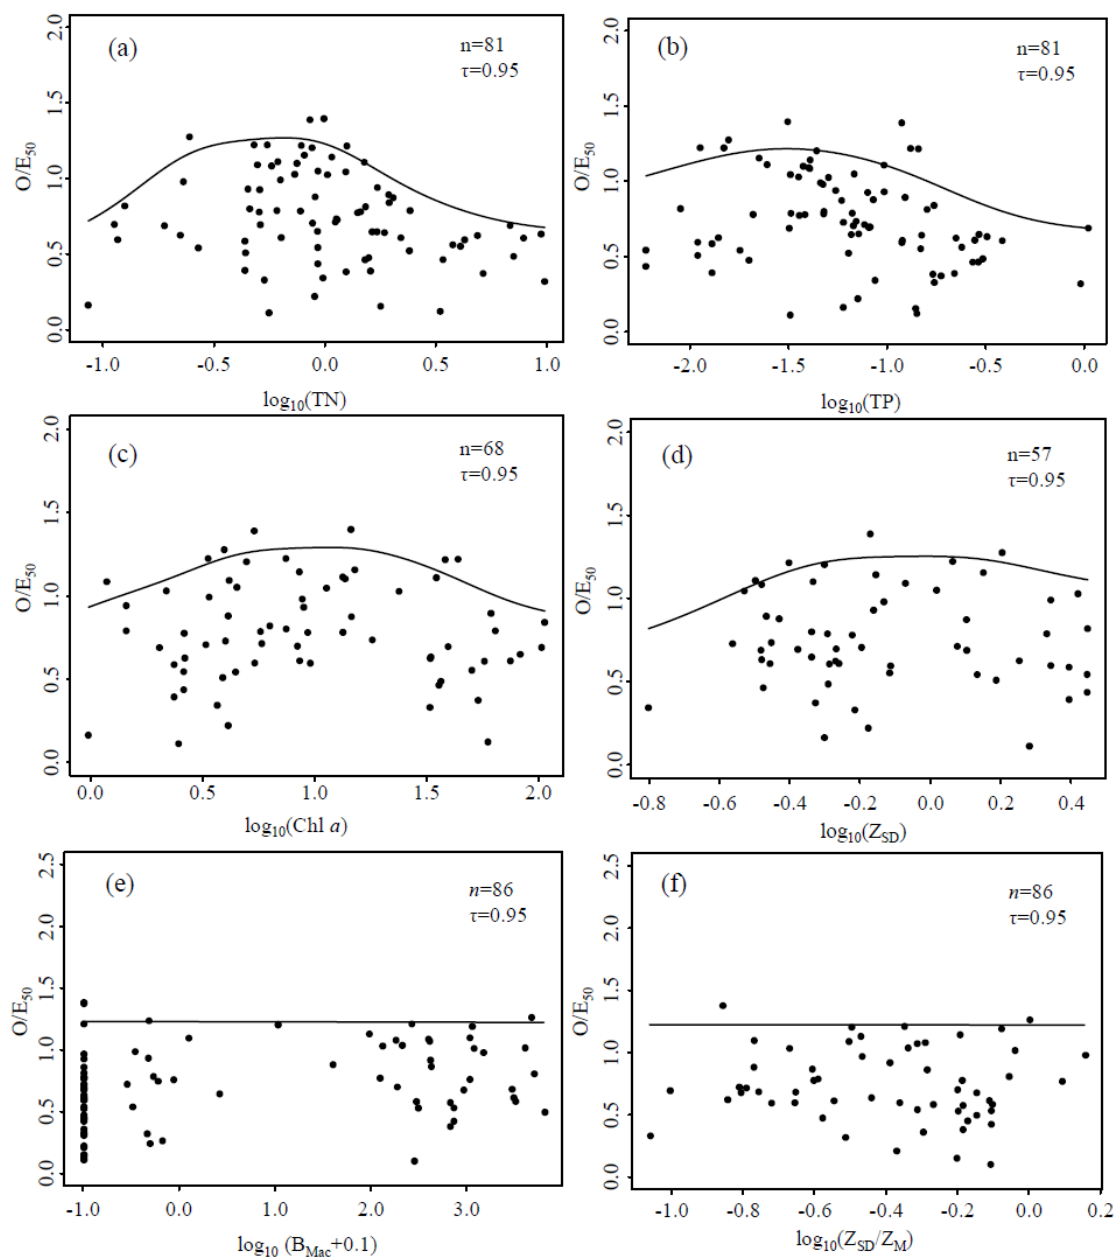

**Figure S3.** Quantile regressions of O/E<sub>50</sub> index on total nitrogen (TN, mg/L), total phosphorus (TP, mg/L), chlorophyll *a* of phytoplankton (Chl *a*, µg/L), Secchi depth (Z<sub>SD</sub>, m), annual submersed macrophytes biomass (B<sub>Mac</sub>, g/m<sup>2</sup>) and ratio of Secchi depth to water depth (Z<sub>SD</sub>/Z<sub>M</sub>, m) (sample sizes differ because of deficient sampling)

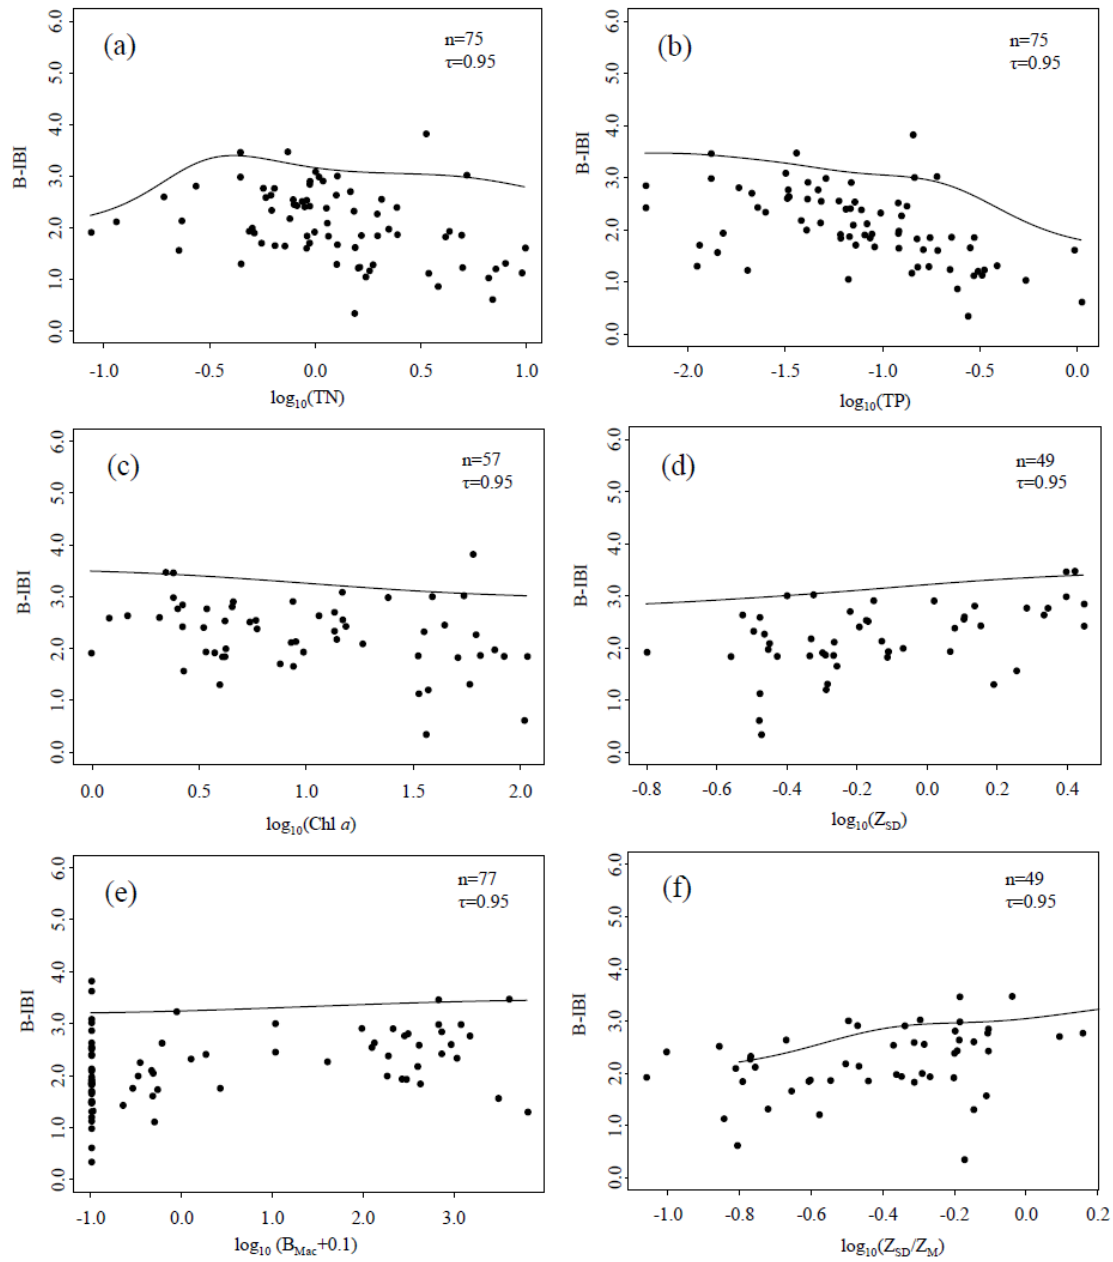

**Figure S4.** Quantile regressions of B-IBI index on total nitrogen (TN, mg/L), total phosphorus (TP, mg/L), chlorophyll *a* of phytoplankton (Chl *a*, µg/L), Secchi depth (Z<sub>SD</sub>, m), annual submersed macrophytes biomass (B<sub>Mac</sub>, g/m<sup>2</sup>) and ratio of Secchi depth to water depth (Z<sub>SD</sub>/Z<sub>M</sub>, m) (sample sizes differ because of deficient sampling)

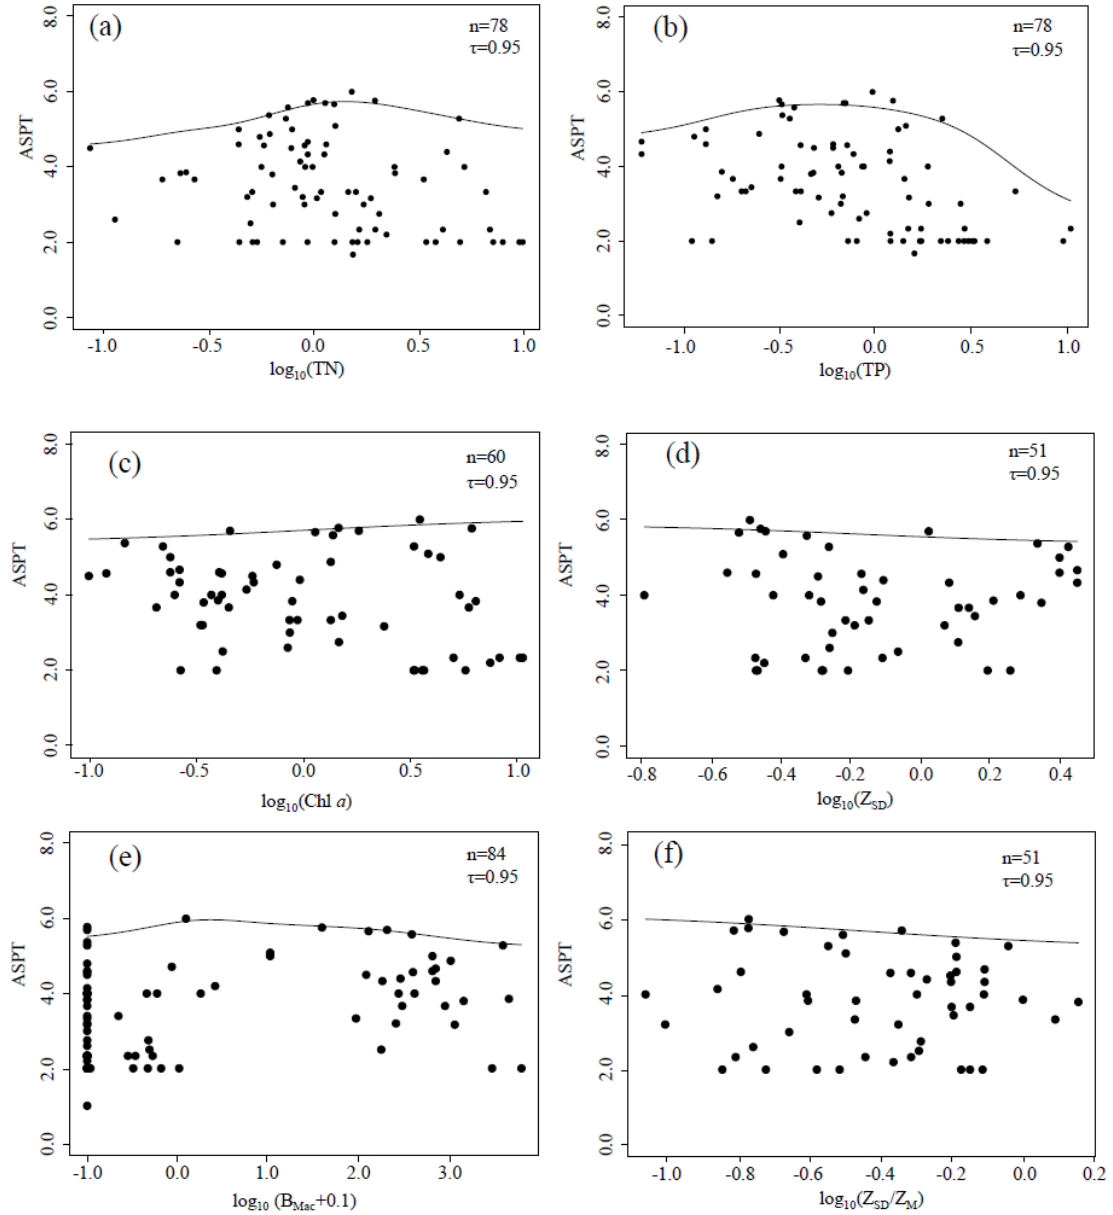

**Figure S5.** Quantile regressions of ASPT index on total nitrogen (TN, mg/L), total phosphorus (TP, mg/L), chlorophyll *a* of phytoplankton (Chl *a*,  $\mu\text{g/L}$ ), Secchi depth ( $Z_{SD}$ , m), annual submersed macrophytes biomass ( $B_{Mac}$ ,  $\text{g/m}^2$ ) and ratio of Secchi depth to water depth ( $Z_{SD}/Z_M$ , m) (sample sizes differ because of deficient sampling)
